# Supplementary material
Source: MDPI journal article supplement (https://www.mdpi.com/2079-6412/13/4/675)
Supplement: s1 [file s1]

# Supplemental material: The Effect of Curing Temperature and Thickness of Polybutyl Methacrylate Siloxane Coatings on the Corrosion Protection of Structural Steel S355

Damir Hamulić <sup>1,2</sup>, Gregor Medoš <sup>1</sup>, Dorota Korte <sup>3</sup>, Peter Rodič <sup>1,\*</sup> and Ingrid Milošev <sup>1</sup>

<sup>1</sup> Department of Physical and Organic Chemistry, Jožef Stefan Institute, Jamova cesta 39, SI-1000 Ljubljana, Slovenia; damir187@hotmail.com (D.H.); medos.gregor@gmail.com (G.M.); ingrid.milosev@ijs.si (I.M.)

<sup>2</sup> Jožef Stefan International Postgraduate School, Jožef Stefan Institute, Jamova cesta 39, SI-1000 Ljubljana, Slovenia

<sup>3</sup> Laboratory for Environmental and Life Sciences, University of Nova Gorica, Vipavska cesta 13, SI-5000 Nova Gorica, Slovenia; dorota.korte@ung.si

\* Correspondence: peter.rodic@ijs.si

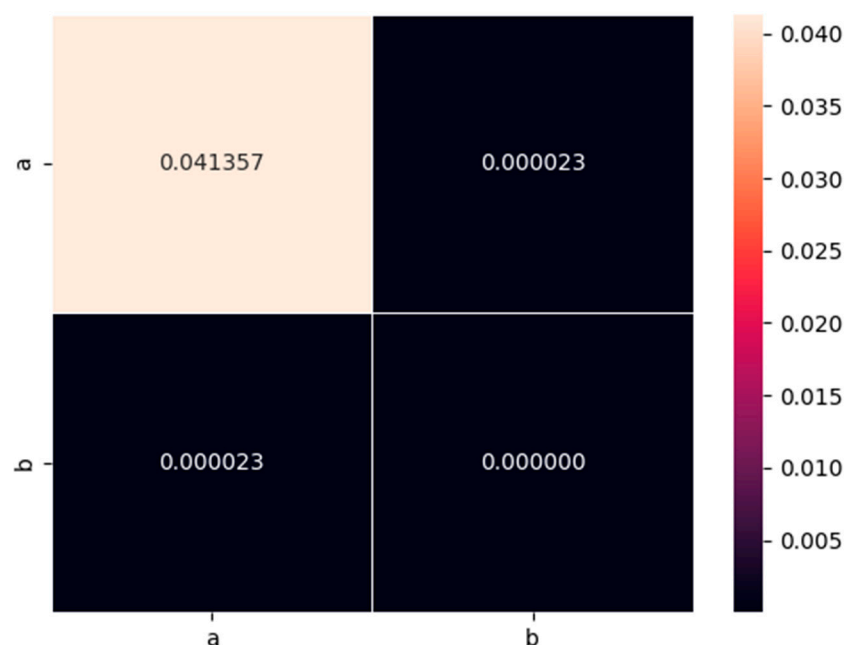

**Figure S1.** The covariance matrix for fitted parameters a and b.

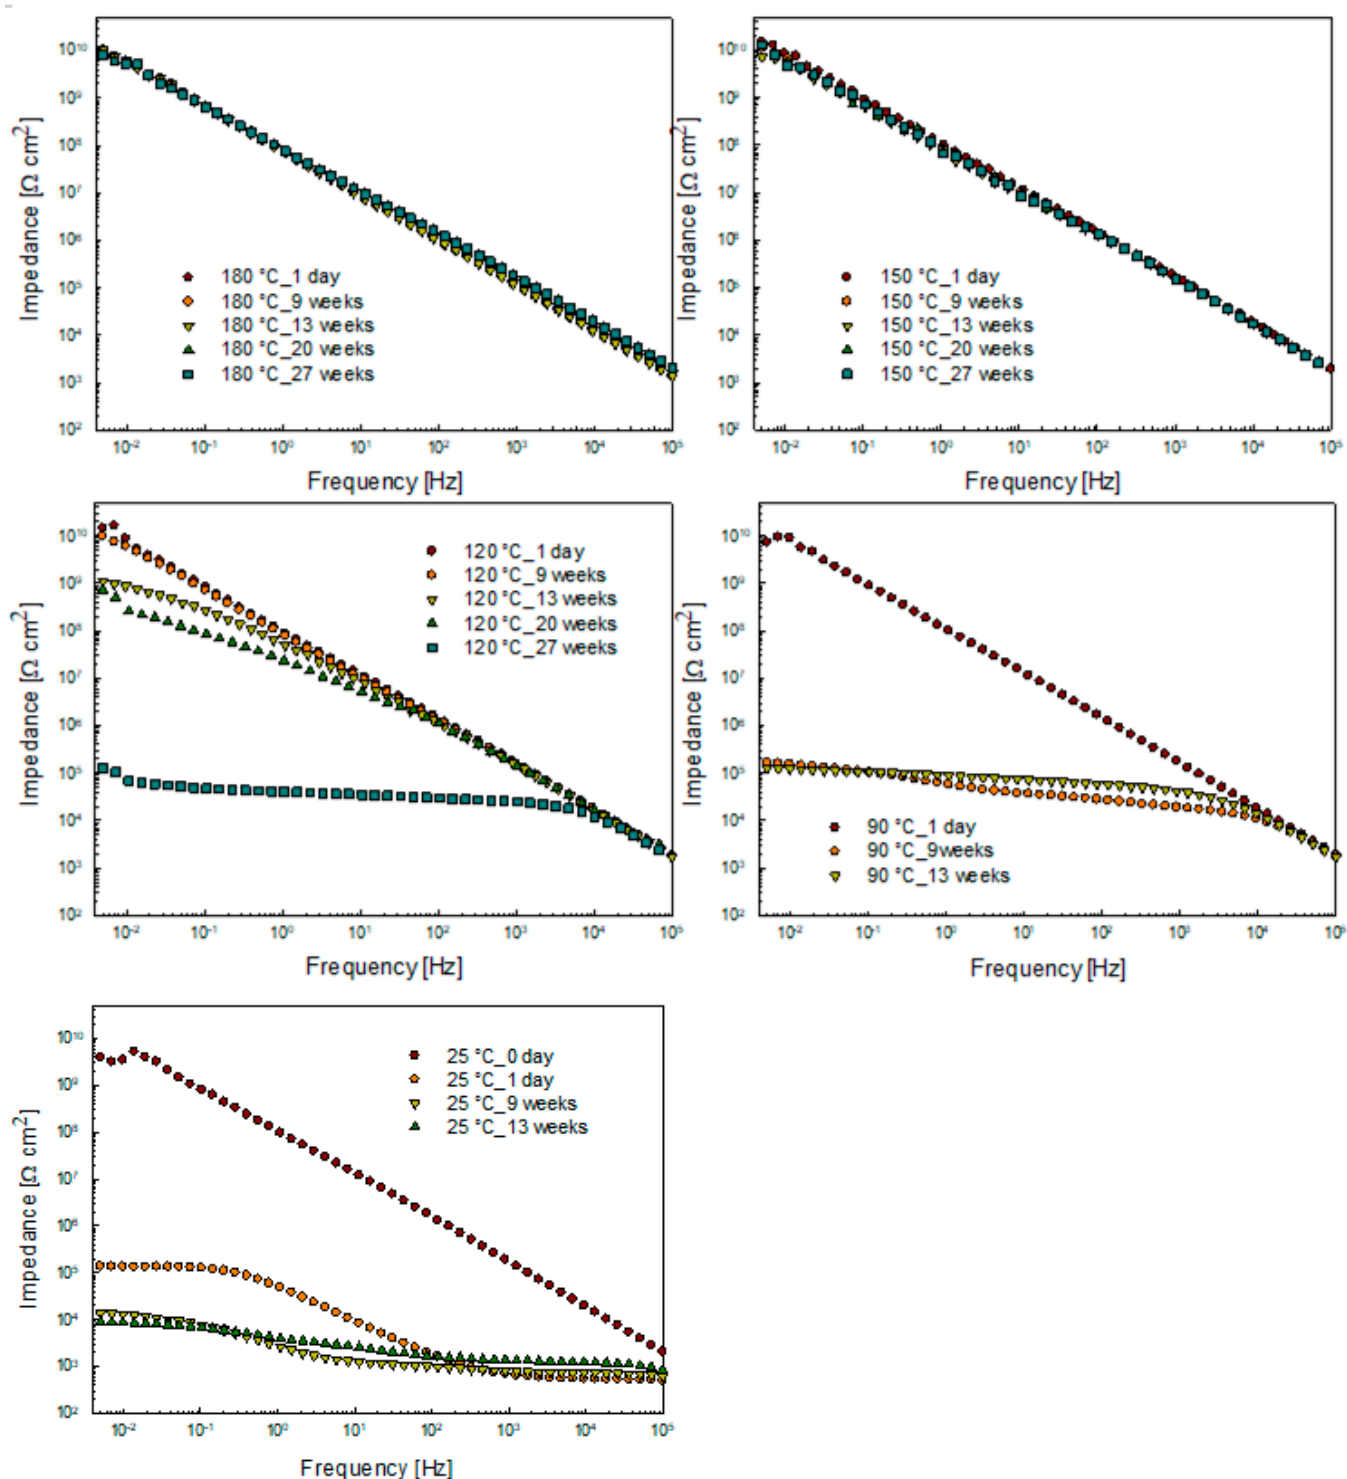

**Figure S2.** Bode plots of impedance magnitude of PBMA-siloxane coatings, cured at different temperatures and measured after immersion in 3.5 wt.% NaCl for up to 27 weeks. Symbols correspond to the experimental data.

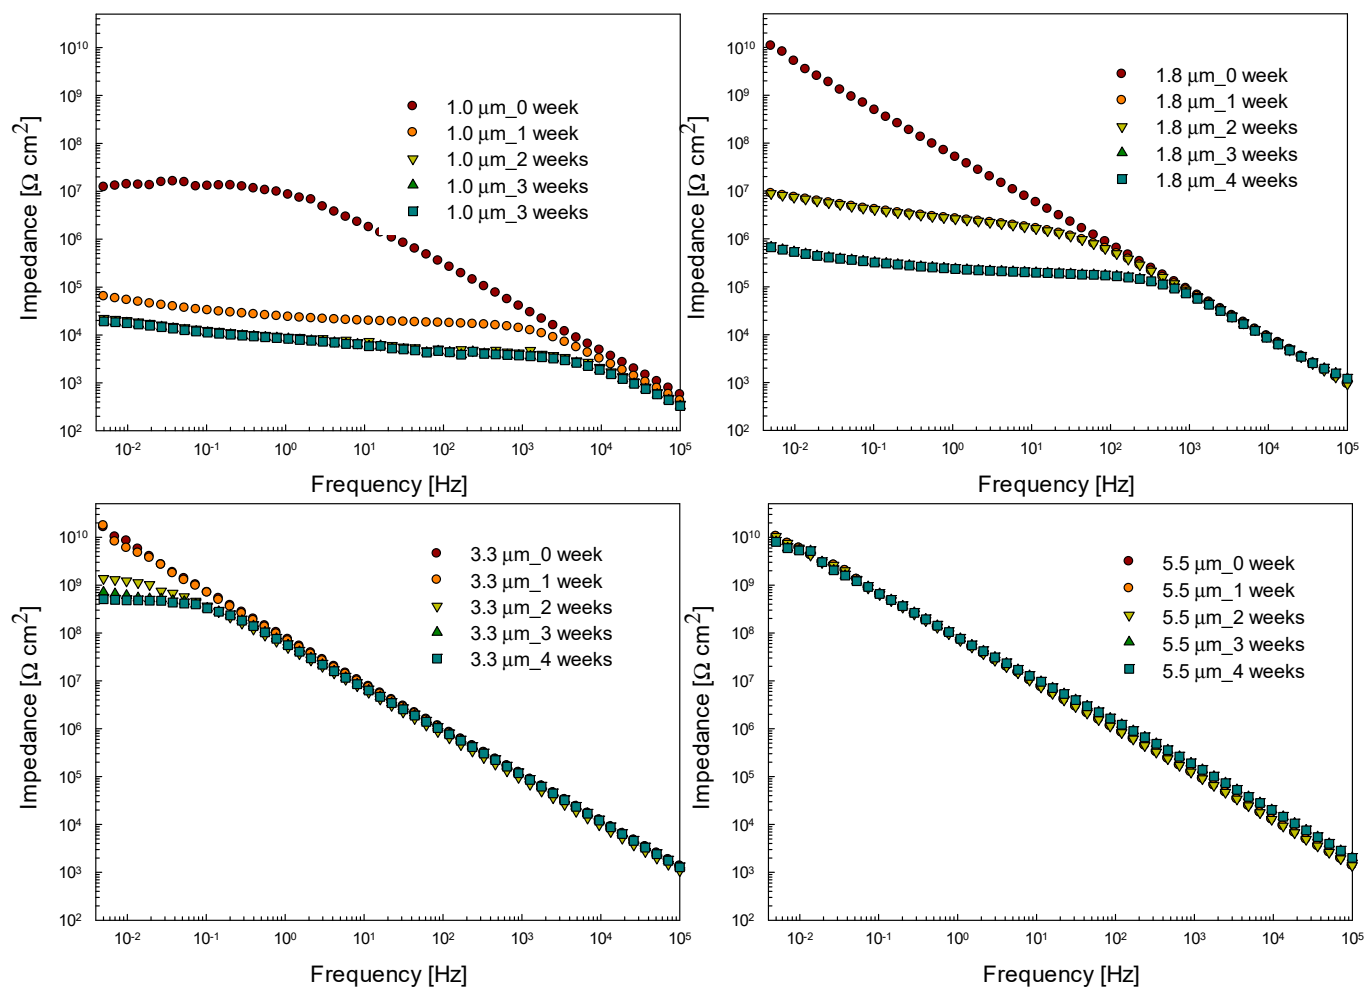

**Figure S3.** Bode plots of impedance magnitude of PBMA-siloxane coatings, deposited at different thicknesses and measured after immersion in 3.5 wt.% NaCl for up to 4 weeks. Symbols correspond to the experimental data.
